# Supplementary material for: Copper (II) Species with Improved Anti-Melanoma and Antibacterial Activity by Inclusion in β-Cyclodextrin
Source: MDPI journal article supplement (doi:10.3390/ijms24032688), 2023-01-31
Supplement: s1 [file s1]

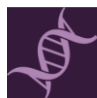

Article

# Copper (II) species with improved anti-melanoma and antibacterial activity by inclusion in $\beta$ -cyclodextrin

Alina Tirsoaga <sup>1</sup>, Victor Cojocaru <sup>2</sup>, Mihaela Badea <sup>2</sup>, Irinel Adriana Badea <sup>1,\*</sup>, Arpad Mihai Rostas <sup>3</sup>, Roberta Stoica <sup>4</sup>, Mihaela Bacalum <sup>4</sup>, Mariana Carmen Chifiriuc <sup>5,6,7</sup>, and Rodica Olar <sup>12\*</sup>

<sup>1</sup> University of Bucharest, Faculty of Chemistry, Department of Analytical and Physical Chemistry, 4-12 Regina Elisabeta Av., District 3, 030018 Bucharest, Bucharest, Romania

<sup>2</sup> University of Bucharest, Faculty of Chemistry, Department of Inorganic and Organic Chemistry, Biochemistry and Catalysis, 90-92 Panduri Str., District 5, 050663 Bucharest, Romania

<sup>3</sup> National Institute for Research and Development of Isotopic and Molecular Technologies, Department of Physics of nanostructured systems, 67-103 Donat Str., 400293 Cluj-Napoca, Romania

<sup>4</sup> Horia Hulubei National Institute for Physics and Nuclear Engineering, Department of Life and Environmental Physics, 30 Reactorului Str., 077125 Magurele-Ilfov, Romania

<sup>5</sup> Department of Microbiology, Faculty of Biology, University of Bucharest, 1-3 Aleea Portocalelor Str., District 5, 060101 Bucharest, Romania

<sup>6</sup> Romanian Academy of Scientists, 54 Spl. Independentiei Str., District 5, 050085 Bucharest, Romania

<sup>7</sup> The Romanian Academy, 25, Calea Victoriei, Sector 1, District 1, 010071 Bucharest, Romania

\* Correspondence: irinel.badea@chimie.unibuc.ro (I.B.); rodica.olar@chimie.unibuc.ro (R.O.)

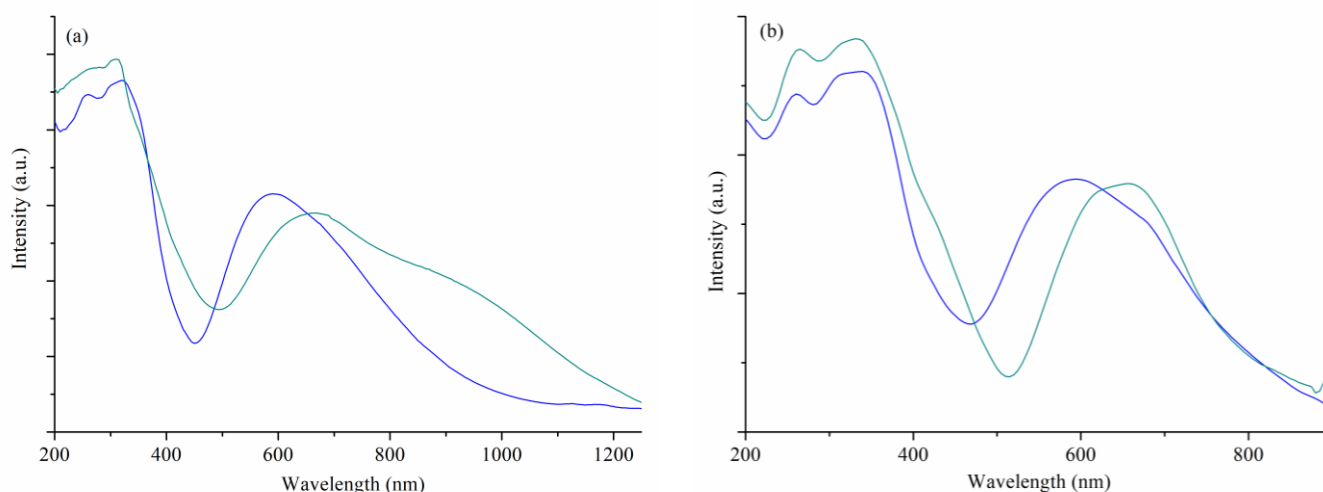

**Figure S1.** Solid state UV-Vis spectra of complexes (1) (dark blue) and (1a)@ $\beta$ -CD (dark green) (a) and (2) (dark blue) and (2a)@ $\beta$ -CD (dark green) (b) (diffuse reflectance technique with spectralon as reference).

**Table S1.** Absorption maxima (cm<sup>-1</sup>) in IR spectra of  $\beta$ -CD, (1a)@ $\beta$ -CD, and (2a)@ $\beta$ -CD and their assignments.

| $\beta$ -CD                                                | (1a)@ $\beta$ -CD | (2a)@ $\beta$ -CD | Assignments                           |
|------------------------------------------------------------|-------------------|-------------------|---------------------------------------|
| 3525 vs, 3480 vs,<br>3421 vs, 3340 vs,<br>3266 vs, 3222 vs | 3405 m, wide      | 3386 s, wide      | $\nu(\text{OH})$                      |
| -                                                          | 3072 m            | 3050 m            | $\nu(\text{CH})_{\text{aromatic}}$    |
| 2927 m                                                     | 2926 w            | 2926 m            | $\nu(\text{CH})$                      |
| 1645 m                                                     | 1629 s            | 1629 s            | $\delta(\text{OH})$                   |
| -                                                          | 1551 s            | 1552 s            | $\nu(\text{C}=\text{N})$              |
| 1155 s                                                     | 1143m             | 1120 s            | $\nu(\text{C}-\text{O}-\text{C})$     |
| 1054 s                                                     | 1080 m            | 1080 s            | $\nu(\text{C}-\text{OH})$             |
| -                                                          | 1089 vs           | 1079 vs           | $\nu_3(\text{ClO}_4)$                 |
| -                                                          | 781 w, 724 w      | 778 m, 731 w      | $\gamma(\text{CH})_{\text{aromatic}}$ |
| -                                                          | 624 m             | 624 m             | $\nu_4(\text{ClO}_4)$                 |
| -                                                          | 485 w             | 485 w             | $\nu(\text{Cu}-\text{O})$             |
| -                                                          | 438 w             | 430 w             | $\nu(\text{Cu}-\text{N})$             |

vs = very strong, s = strong, m = medium, w -weak.
